# Supplementary material for: Ultrasound-Assisted Extraction Optimization of α-Glucosidase Inhibitors from Ceratophyllum demersum L. and Identification of Phytochemical Profiling by HPLC-QTOF-MS/MS
Source: MDPI journal article supplement (doi:10.3390/molecules25194507), 2020-10-01
Supplement: s1 [file s1]

## Supplementary material

**Table 1.** Correlation analysis between the bioactive compounds and  $\alpha$ -glucosidase inhibitory activity of CDL extracts.

|               | TPC | TFC    | $\alpha$ -Glu |
|---------------|-----|--------|---------------|
| TPC           | 1   | -0.204 | -0.449        |
| TFC           |     | 1      | -0.648 **     |
| $\alpha$ -Glu |     |        | 1             |

Note: TPC: Total phenolic content; TFC: Total flavonoid content;  $\alpha$ -Glu:  $\alpha$ -glucosidase inhibitory activity; \*\* represents extreme correlation ( $P < 0.01$ ); \* represents significant correlation ( $P < 0.05$ ).
